# Host auxin machinery is important in mediating root architecture changes induced by *Pseudomonas fluorescens* GM30 and *Serendipita indica*

## Authors

Anna Matthiadis<sup>¶</sup>, Poornima Sukumar<sup>¶</sup>, Alyssa DeLeon, Dale Pelletier, Jessy L. Labbé, Gerald A Tuskan and Udaya C Kalluri\*

<sup>¶</sup>Authors contributed equally to this manuscript

\*Corresponding Author; kalluriudayc@ornl.gov

Author affiliation: Biosciences Division, Oak Ridge National Laboratory, PO BOX 2008, Oak Ridge, TN 37831-6422.

*This manuscript has been authored by UT-Battelle, LLC under Contract No. DE-AC05-00OR22725 with the U.S. Department of Energy. The United States Government retains and the publisher, by accepting the article for publication, acknowledges that the United States Government retains a non-exclusive, paid-up, irrevocable, world-wide license to publish or reproduce the published form of this manuscript, or allow others to do so, for United States Government purposes. The Department of Energy will provide public access to these results of federally sponsored research in accordance with the DOE Public Access Plan(<http://energy.gov/downloads/doe-public-access-plan>).*

## Abstract

Auxin is a key phytohormone that is integral to plant developmental processes including those underlying root initiation, elongation, and branching. Beneficial microbes have been shown to have an impact on root development, potentially mediated through auxin. In this study, we explore the role of host auxin signaling and transport components in mediating the root growth promoting effects of beneficial microbes. Towards this end, we undertook co-culture studies of *Arabidopsis thaliana* plants with microbes previously reported to promote lateral root proliferation and produce auxin. Two types of beneficial microbes were included in the present study; a plant growth promoting bacterial species of interest, *Pseudomonas fluorescens* GM30, and a well-studied plant

growth promoting fungal species, *Serendipita indica* (*Piriformospora indica*). Following co-culture, lateral root production was found restored in auxin transport inhibitor-treated plants, suggesting involvement of microbe and/or microbially-produced auxin in altering plant auxin levels. In order to clarify the role of host auxin signaling and transport pathways in mediating interactions with bacterial and fungal species, we employed a suite of auxin genetic mutants as hosts in co-culture screens. Our result show that the transport proteins PIN2, PIN3, and PIN7 and the signaling protein ARF19, are required for mediating root architecture effects by the bacterial and/or fungal species. Mutants corresponding to these proteins did not significantly respond to co-culture treatment and did not show increases in lateral root production and lateral root density. These results implicate the importance of host auxin signaling in both bacterial and fungal induced changes in root architecture and serve as a driver for future research on understanding the role of auxin-dependent and auxin-independent pathways in mediating plant-microbe interactions in economically important crop species.

**Keywords:** Plant-Microbe Interactions, Auxin, Root, Development, Beneficial Microbes

## Introduction

Auxin is a key phytohormone that plays essential roles in above- and belowground plant developmental and physiological processes including embryogenesis, vascular patterning, seedling growth, apical dominance, tropic responses, and root growth and development (Enders and Strader, 2015; Taylor-Teeple et al. 2016). A modulation in concentration and location of auxin signal can dramatically influence plant growth and development. In belowground tissues, an internal genetically-mediated or external chemical increase in auxin concentration have been shown to inhibit root elongation and promote the development of lateral roots in a dose-dependent manner (Malamy 2005; Peret et al. 2009). The role of auxin has been further extended to its involvement in plant-microbe interactions in the root including nodulation and rhizobia symbiosis (Spaepen and Vanderleyden 2011; Grunewald et al. 2009) and non-nodule forming beneficial plant-microbe relationships (Sukumar et al. 2013; Boivin et al. 2016; Poupin et al. 2016). Specifically, microbes that can produce more auxin have been shown to have a greater beneficial impact on plant growth (Asghar et al. 2002; Khalid et al. 2004; Remans et al. 2007; Spaepen et al.

2014; Verbon and Liberman 2016). Recent studies have also demonstrated a link between microbe-induced lateral root formation and auxin or auxin-signaling pathways (Contreras-Cornejo et al. 2009; Zamioudis et al. 2013), but much remains to be characterized about the genetic implications and the underlying molecular mechanisms of these interactions, and whether specific molecular players are common to all microbe interactions or operate with species or strain specificity.

Our understanding of the role of auxin in plant-microbe interactions is limited and research efforts have largely included genetic and molecular investigations of pathogenic interactions, transcriptomics or proteomics changes associated with plant-microbe interactions, and a limited number of host genetic and mutant evaluations with beneficial microbes such as under nodulation (Grunewald et al. 2009; Zhao 2010; Sukumar et al. 2013; Contreras-Cornejo et al. 2015; Boivin et al. 2016; Poupin et al. 2016; French et al. 2018; Estenson et al. 2018). Auxin action can be regulated at the levels of biosynthesis, transport, and signal transduction (Lavy and Estelle, 2016). Given that increases in auxin synthesis may occur in microbes, outside of *in vivo* plant biosynthesis, investigation of transport and signal transduction within the plant can shed light on mechanisms of auxin-dependent/independent root system architecture alterations due to plant-microbe interactions.

Directional auxin transport is mediated by auxin influx proteins such as AUX1 (AUXIN RESISTANT 1) and LAX (LIKE AUXIN) and auxin efflux proteins including those belonging to PIN FORMED (PIN) and ATP BINDING CASSETTE B/MULTIDRUG RESISTANCE/P-GLYCOPROTEIN (ABCB/MDR/PGP) families (Teale et al. 2006; Kalluri et al. 2011; Enders and Strader, 2015). PIN2, PIN3, and PIN7 transport proteins have been implicated in lateral root formation in *Arabidopsis thaliana*. Specifically, *pin2*, *pin3*, and *pin2,3,7* mutants are known to have altered lateral root formation (Laskowski et al. 2008; Dubrovsky et al. 2009), PIN3 has been shown to be important for directing auxin to founder cells and promoting lateral root initiation (Marhavy et al. 2013), and *PIN3* and *PIN7* are known to be induced by IAA treatment (Lewis et al. 2011).

Auxin signaling components involve the auxin-binding receptor TRANSPORT INHIBITOR RESPONSE 1 (TIR1) F-box proteins, which recognize AUX/IAA proteins as part of an E3 ligase receptor complex and ubiquitinate the proteins for 26S proteasome-dependent degradation. Removal of the repressor AUX/IAA protein from its binding partner protein, AUXIN RESPONSE FACTOR (ARF), triggers the ARF activity as a specific activator or repressor of auxin response gene transcription (Peret et al. 2009; Wang et al 2014; Roosjen et al. 2018). Several ARF isoforms have been implicated in regulating a variety auxin-dependent developmental processes in *Arabidopsis* (Roosjen et al. 2018). ARF7 and ARF19 have been reported to have partially redundant roles in the regulation of lateral root initiation through activation of LATERAL ORGAN BOUNDARIES-DOMAIN16 and 29 proteins (LBD16 and LBD29) (Okushima et al. 2005; Wilmoth et al. 2005; Okushima et al. 2007).

Past expression studies suggest functional roles for auxin transport and signaling proteins in root responses to plant-microbe interactions. *PIN2*, *PIN3*, and *ARF7* are upregulated in the colonization of *Arabidopsis* with the growth promoting bacteria *Burkholderia phytofirmans* PsJN ( Sessitsch et al. 2005; Poupin et al. 2016), which has been recently reclassified under the genus name *Paraburkholderia* (Sawana et al. 2014). This study also employed a specific *Arabidopsis* auxin signaling genetic mutant, *iaa1/axr5-1*, to characterize co-culture effects (Poupin et al. 2016). Reduced lateral root induction was observed in *Arabidopsis* in co-culture with the ectomycorrhizal fungus *Laccaria bicolor* in *pin2* and *pin2, 3, 4, 7* mutants (Felten et al. 2009) and with the bacteria *Pseudomonas fluorescens* WCS417 in an *arf7arf19* double mutant (Zamioudis et al. 2013). Additional studies using more diverse beneficial microbial species, especially employing auxin genetic mutants, will help to elucidate the involvement of host auxin machinery.

Here we present new evidence supporting functional relevancy of host auxin transport and signaling components in mediating root architecture changes induced by non-nodule-forming, growth-promoting beneficial microbes. Specifically, we undertook co-culture screens in tissue culture using a suite of auxin genetic mutants followed by root architecture assessments. The targeted co-culture screens included two divergent species: *Serendipita indica* (*S. indica*; *Piriformospora indica*), a fungal root endophyte, and *Pseudomonas fluorescens* strain GM30, a bacterial root endophyte. *S. indica* is a plant growth promoting microbe (PGPM) that has been

widely shown to form mutualistic associations with and enhance growth in a variety of species including *Arabidopsis* (Verma et al. 1998; Peskan-Berghofer et al. 2004; Oelmüller et al. 2009). The bacterial isolate *P. fluorescens* GM30 has been shown to alter plant development in *Arabidopsis* (Weston et al. 2012; Timm et al. 2015) and other plant species such as *Populus* (Henning et al. 2016). Both *S. indica* and *P. fluorescens* GM30 are capable of producing auxin and enhancing lateral root formation (Sirrenberg et al. 2007; Timm et al. 2015), however, the host genetic influence on these beneficial associations is unclear. Specifically, it is unclear if these root effects are dependent on auxin and host auxin molecular factors and whether these factors are broadly conserved between bacterial and fungal beneficial microbes.

## Materials and methods

### *Plant and microbial materials and growth conditions, and plant phenotypic measurements*

*Arabidopsis thaliana* seeds were surface sterilized and plated on ½ MS media with 10 g/L sucrose, 0.5 g/L MES, and 3 g/L Gelzan™ Gelrite® (Sigma-Aldrich) and incubated in a growth chamber under 16-h photoperiod at 22 °C. External auxin treatment included application of 10 µM 1-naphthaleneacetic acid (NAA) or 100 µM indole-3-butyric acid (IBA), and auxin transport inhibitor treatment included application of 100 µM 1-N-naphthylphthalamic acid (NPA) to plates containing 5- day old seedlings. Root measurements (total root length, number of lateral roots and primary root length) were recorded for 12- and 19- day- old seedlings (7- and 14- days following inoculation, respectively) using a WinRHIZO™ scanner ([http://regent.qc.ca/assets/winrhizo\\_image\\_acquisition.html](http://regent.qc.ca/assets/winrhizo_image_acquisition.html)). Mutant seeds were obtained from ABRC (Arabidopsis Biological Resource Center) or from kindly donated by Dr Gloria Muday Laboratory and these include; *pin2* (*eir1-1* - CS8058) and *iaa14* (*slr-1* - CS25214) and from previously published research: *pin3pin7* (*pin3-5* - SALK\_005544, *pin7-1* - SALK\_048791), *arf7* (*nph4-1*), and *arf19* (*arf19-1* - CS24617). Control seedlings were generated from wild-type *Arabidopsis thaliana* (Col-0) seeds. *Pseudomonas fluorescens* strain GM30 and other bacterial strains were cultured overnight at 30 °C in R2A media (Teknova) and diluted to OD<sub>600nm</sub> of 0.8 before inoculating plants by streaking. *Serendipita indica* (*Piriformospora indica*; belonging to *Hymenomycetes*, *Basidiomycota*) is a cultivable fungal endophyte that colonizes roots. *S.*

*indica* has been studied for its multifunctional activities like plant growth promoter, immune modulator and biocontrol. *S. indica* was maintained at 30 °C in dark on modified Pachlewski medium P5 (Deveau et al., 2007). Three-weeks-old cultures were used and applied to seedling plates as plugs in ½ MS media with 10 g/L sucrose, 0.5 g/L MES, and 3 g/L Gelzan™ Gelrite® (Sigma-Aldrich) and growth chamber under 16-h photoperiod at 22 °C. Statistical significance was based on two-way ANOVA and  $p \leq 0.05$ . *Pseudomonas* strains include; *P. fluorescens* strains GM15, GM17, GM19, GM25, GM30, GM60, GM65, GM84 and GM89 from our previously reported collection (Jun et al. 2015; Timm et al. 2015), and *P. protegens* Pf-5/ATCC BAA-477, previously named as *Pseudomonas fluorescens* Pf-5 (Howell and Stipanovic, 1979), which was obtained from the American Type Culture Collection (Manassas, VA, U.S.A.) for this study.

## Results and discussion

### *Application of exogenous auxin or beneficial microbes leads to lateral root proliferation*

In order to define the baseline effect of exogenous auxin application or elevated auxin level on root architectural changes in wild-type *Arabidopsis thaliana* (Col-0) seedlings, auxin in the forms 1-naphthaleneacetic acid (NAA) and indole-3-butyric acid (IBA) were applied as agar streaks towards the bottom of the agar plate (Fig. 1a). The effect on root architecture was analyzed after seven days of treatment. Treatment with NAA and IBA resulted in enhanced lateral root emergence or proliferation. Increased lateral root production, with shorter lateral root length, was observed at seven days post co-culture with *S. indica* or GM30 relative to the uninoculated control (Supplemental Fig. 1), indicating that this effect could be auxin dependent. The auxin efflux inhibitor, 1-N-naphthylphthalamic acid (NPA), is known to arrest lateral root emergence (Petrasek et al. 2003). Hence, we examined the ability of these auxin-producing microorganisms to alleviate the auxin transport inhibitor-induced suppression of lateral root formation. NPA was applied locally at root-shoot junctions of 5-day old seedlings at the start of co-culture. Images were collected (Fig. 1b) and lateral root count was recorded (Fig. 1c) following seven days of treatment. While treatment with NPA resulted in no lateral root production in non-inoculated wild-type controls, addition of either *S. indica* or GM30 post-NPA treatment resulted in lateral root production (Fig. 1c). The restoration of lateral root formation with addition of *S. indica* or GM30



suggests that additional auxin signal, either in the form of microbial auxin and/or plant auxin, may be integral to pathways that modulate host root architecture in co-culture with these beneficial microbes.

# ***Auxin transport and signaling machinery is important in mediating microbe-induced root architecture changes***

To gain an understanding of the core and differentiated components of host auxin pathways involved in bacterial- and/or fungal-mediated root architectural changes, we employed a genetic approach based on co-culture screens with known auxin genetic mutants. *Arabidopsis* mutants in auxin transport and signaling pathways were selected based on their previously reported involvement in formation or development of lateral or primary root growth. Changes in lateral root density induced by co-culture of *S. indica* and GM30 were examined and compared to wild-type plants (Fig. 2). The transport mutants displayed reduced response to co-culture-induced changes in root architecture. The *pin3pin7* double mutant displayed reduced responses to both microbes and *pin2* responded significantly to *S. indica* co-culture but not to GM30, relative to response in wild-type *Arabidopsis* (Fig. 2). The reduced *S. indica*- or *P. fluorescens*-induced host effects observed in transport pathway genetic mutants implicate the auxin transport machinery as integral to mediating growth promoting effects on the host via translation of changes in auxin levels into localized patterns of maxima and minima required for lateral root initiation. Our study also provides, to our knowledge, the first genetic evidence for auxin's central role in mediating plant growth effects by *P. fluorescens* GM30.

Among the auxin signaling mutants examined, *arf19* seedlings were found to be insensitive to co-culture, with either the bacterial or fungal symbiont (Fig. 2). The *arf19* mutant had a significantly lower lateral root density compared to wild-type even without microbial treatment, reflecting and confirming the well-studied role of ARF19 in lateral root development (Wilmoth et al. 2005). These results indicate that ARF19 may be critical not just in lateral root development but also in mediating root growth promoting effects of microbes. ARF7, whose function is reported to be partially redundant with ARF19 in lateral root development, also had a significantly lower lateral root density compared to wild-type under no microbe treatment yet was able to respond

significantly to both microbial treatments (Fig. 2). *ARF19* has been reported to express more strongly relative to *ARF7* in roots (Okushima et al. 2005) supporting a plausible dominant role for *ARF19* in microbe-mediated lateral root initiation.

The overall effects demonstrated are likely not specific to the *Pseudomonas* strain GM30 but may extend to other beneficial bacterial strains and species. Indeed, when testing a suite of additional auxin-producing *Pseudomonas* strains related to GM30 (Jun et al. 2015), we found a similar rescue in lateral root number in plants treated with NPA (Fig. 3), with all bacterial strains significantly increasing lateral root number in NPA treated plants and most strains restoring lateral root number to that of control (wild-type) plants not treated with NPA.

## Conclusion

Our results implicate the importance of host auxin transport and signaling in microbe-induced changes in root architecture and set the stage for future research into the roles of auxin dependent and auxin independent pathways in mediating plant-microbe interactions in economically important crop species. Specifically, this study indicates a role for PIN3, PIN7, and *ARF19* in mediating microbe-induced lateral root formation by both a bacterial and fungal species.

In the future, temporally-resolved experiments involving co-cultures with auxin mutant plants, application of external unlabeled or labeled auxins and auxin inhibitors, and examination of mutant phenotype rescue are needed to validate whether the observed changes are the consequence of adaptations in the plant system to support microbes or part of signal exchange between plant and microbes that leads to phenotypic changes. It is not known at this time whether the microbial auxin or additional biochemicals such as N-acyl-L-homoserine lactones (AHLs) and cyclodipeptides (CDPs) could be produced as a signal for individual microbes or for microbial communities and under what environmental and host-specific circumstances the functional outcomes change. Therefore, temporally-resolved molecular characterization and imaging would provide a clearer view of upstream and downstream events involved in the complex signal transduction process. Studies with a phylogenetically diverse range of bacterial strains to determine the range of specificity in the demonstrated auxin response is also needed. Finally, it is recognized that auxin



action is mediated synergistically or antagonistically with other hormone signaling pathways including those involved in responses to external abiotic and biotic factors (Lewis et al. 2011; Boivin et al. 2016; Verbon and Liberman 2016), warranting a systems-wide view of plant-microbe interactions.

## Acknowledgements

We thank Prof. Gloria Muday and ABRC for provision of *Arabidopsis* mutant seeds used in the study. We thank Whitney McNutt and Daniel Smallwood for assistance with seedling cultures and data analysis, respectively. This research was sponsored by the Genomic Science Program, U.S. Department of Energy, Office of Science, Biological and Environmental Research as part of the Plant Microbe Interfaces Scientific Focus Area (<http://pmi.ornl.gov>). Oak Ridge National Laboratory is managed by UT-Battelle, LLC, for the U.S. Department of Energy under contract DE-AC05-00OR22725.

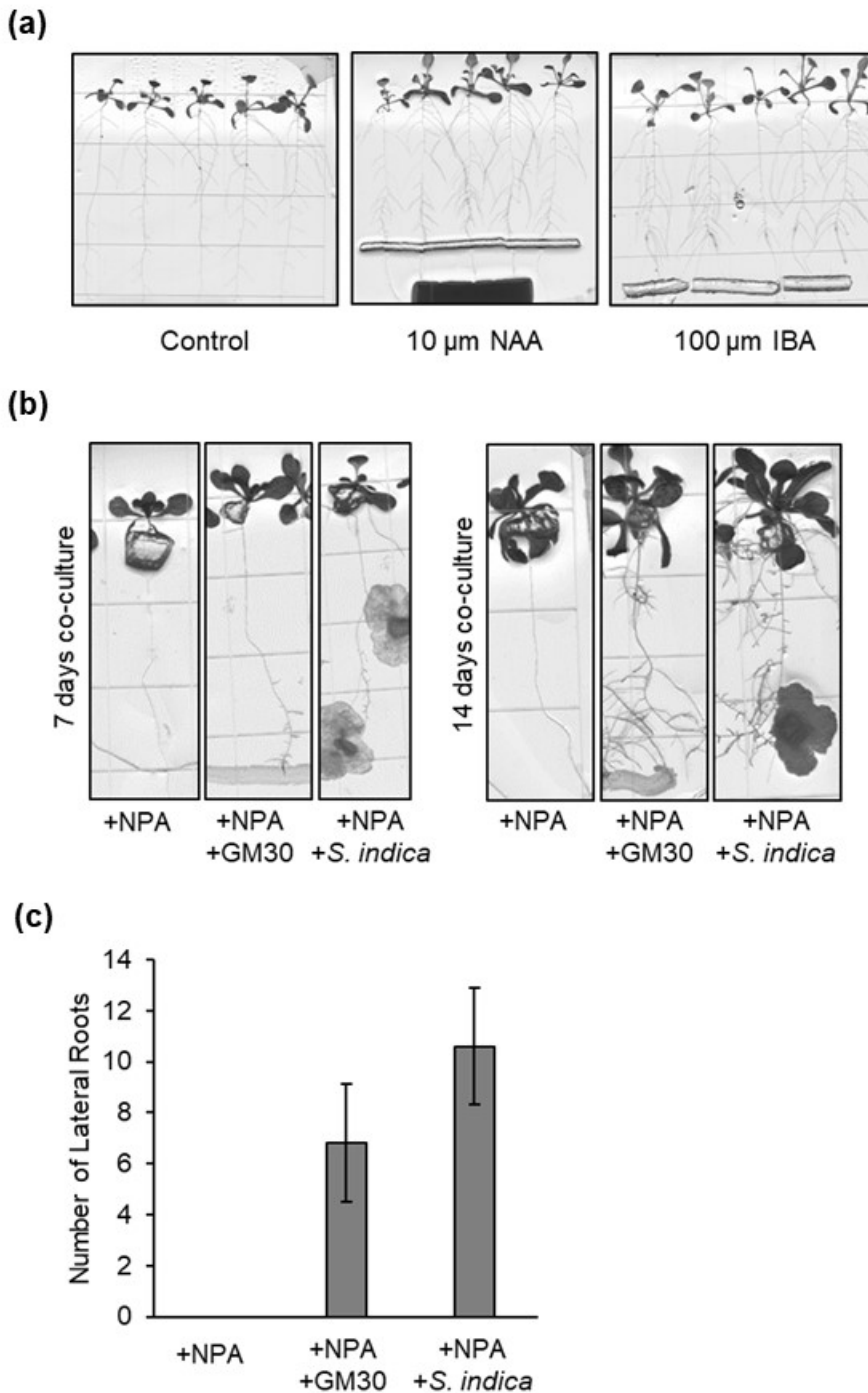

**Fig. 1** (a) Effect of exogenous auxin (NAA and IBA) application on root architecture. (b) Effect of auxin transport inhibitor NPA on lateral root number in Arabidopsis wild-type seedlings with or without co-culture (7 and 14 days). (c) Quantification of effect of NPA with or without co-culture on lateral root number (7 days).

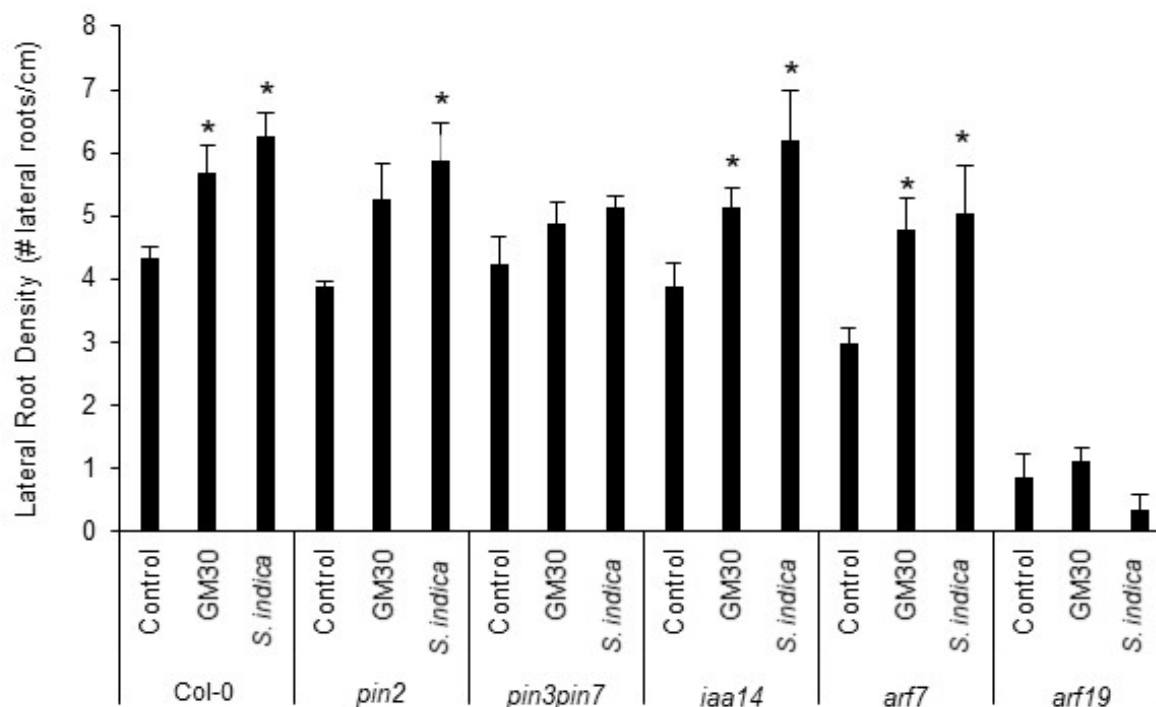

**Fig. 2** Effect of co-culture with *Pseudomonas fluorescens* strain GM30 or *Serendipita indica* on lateral root density in *Arabidopsis* auxin transport and signaling mutant plants, relative to no microbe added control plants. Error bars indicate  $\pm$ SE (n=5) and asterisks indicate significant difference from control ( $p \leq 0.05$ ).

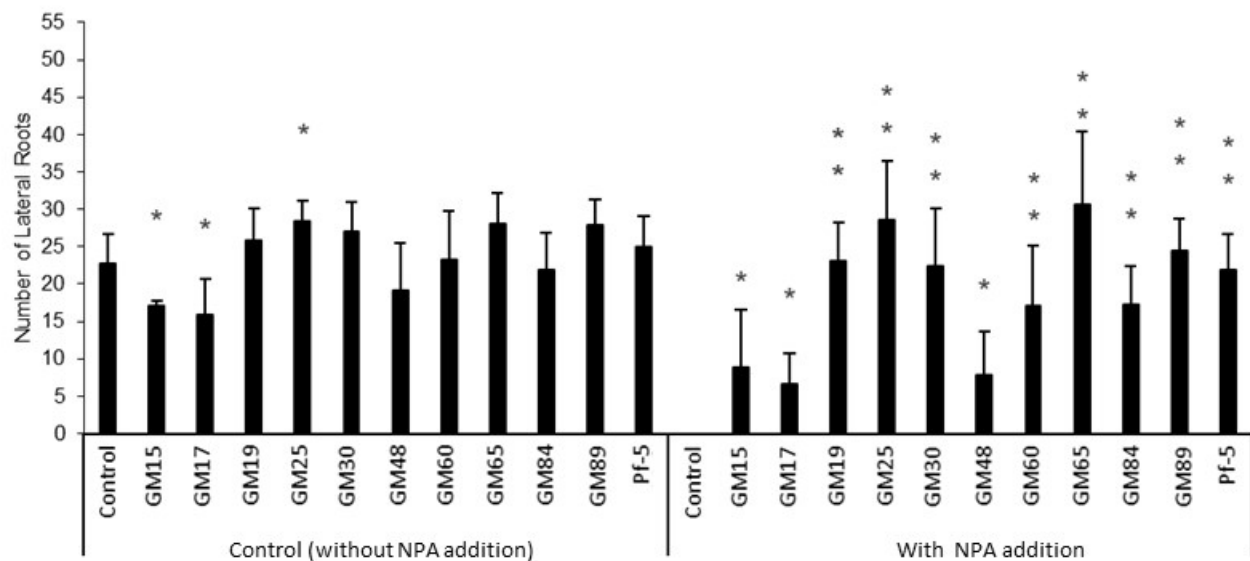

**Fig. 3** Effect of co-culture with various *Pseudomonas* strains on lateral root production in *Arabidopsis* wild-type seedlings, with or without addition of the auxin transport inhibitor NPA. *Pseudomonas* strains on x-axis include; *Pseudomonas fluorescens* strains GM15, GM17, GM19, GM25, GM30, GM60, GM65, GM84 and GM89, and *Pseudomonas protegens* strain Pf-5 (Pf-5). Error bars indicate  $\pm$ SE (n=5). One asterisk indicates significant difference from control plants without co-culture ( $p \leq 0.05$ ). Two asterisks indicate NPA treated plants that are significantly different from NPA treated control plants without co-culture and not significantly different from control plants without NPA (i.e., restored to wild-type lateral root number) ( $p \leq 0.05$ ).

# References

- Asghar HN, Zahir ZA, Arshad M, Khaliq A (2002) Relationship between in vitro production of auxins by rhizobacteria and their growth-promoting activities in *Brassica juncea* L. *Biology and Fertility of Soils* 35 (4):231-237. doi:10.1007/s00374-002-0462-8
- Boivin S, Fonouni-Farde C, Frugier F. (2016) How Auxin and Cytokinin Phytohormones Modulate Root Microbe Interactions. *Front Plant Sci.* 7:1240.
- Contreras-Cornejo HA, Macias-Rodriguez L, Cortes-Penagos C, Lopez-Bucio J (2009) *Trichoderma virens*, a plant beneficial fungus, enhances biomass production and promotes lateral root growth through an auxin-dependent mechanism in *Arabidopsis*. *Plant Physiol* 149 (3):1579-1592.
- Deveau A, Palin B, Delaruelle C, Peter M, Kohler A, Pierrat JC, Sarniguet A, Garbaye J, Martin F, Frey-Klett P (2007) The mycorrhiza helper *Pseudomonas fluorescens* BBc6R8 has a specific priming effect on the growth, morphology and gene expression of the ectomycorrhizal fungus *Laccaria bicolor* S238N. *New Phytol* 175: 743–755
- Dubrovsky JG, Soukup A, Napsucialy-Mendivil S, Jeknic Z, Ivanchenko MG (2009) The lateral root initiation index: an integrative measure of primordium formation. *Ann Bot* 103 (5):807-817.
- Enders TA, Strader LC. Auxin activity: Past, present, and future. (2015) *Am J Bot.* 102(2):180-96.
- Felten J, Kohler A, Morin E, Bhalerao RP, Palme K, Martin F, Ditengou FA, Legue V (2009) The ectomycorrhizal fungus *Laccaria bicolor* stimulates lateral root formation in poplar and *Arabidopsis* through auxin transport and signaling. *Plant Physiol* 151 (4):1991-2005.
- French E, Kim BS, Rivera-Zuluaga K, Iyer-Pascuzzi AS. (2018) Whole Root Transcriptomic Analysis Suggests a Role for Auxin Pathways in Resistance to *Ralstonia solanacearum* in Tomato. *Mol Plant Microbe Interact.*31(4):432-444.
- Estenson K, Hurst GB, Standaert RF, Bible AN, Garcia D, Chourey K, Doktycz MJ, Morrell-Falvey JL. (2018) Characterization of Indole-3-acetic Acid Biosynthesis and the Effects of This Phytohormone on the Proteome of the Plant-Associated Microbe *Pantoea* sp. YR343. *J Proteome Res.* 17(4):1361-1374.

Grunewald W, van Noorden G, Van Isterdael G, Beeckman T, Gheysen G, Mathesius U (2009) Manipulation of auxin transport in plant roots during Rhizobium symbiosis and nematode parasitism. *Plant Cell* 21 (9):2553-2562.

Henning JA, Weston DJ, Pelletier DA, Timm CM, Jawdy SS, Classen AT (2016) Root bacterial endophytes alter plant phenotype, but not physiology. *PeerJ* 4:e2606.

Howell CR, and Stipanovic RD (1979) Control of *Rhizoctonia solani* on cotton seedlings with *Pseudomonas fluorescens* and with an antibiotic produced by the bacterium. *Phytopathology* 69:480-482.

Jun SR, Wassenaar TM, Nookaew I, Hauser L, Wanchai V, Land M, Timm CM, Lu TY, Schadt CW, Doktycz MJ, Pelletier DA, Ussery DW. (2015) Diversity of *Pseudomonas* Genomes, Including Populus-Associated Isolates, as Revealed by Comparative Genome Analysis. *Appl Environ Microbiol.* 82(1):375-83.

Kalluri U, Basu M, Jawdy S, Tuskan G. (2011) Auxin Signaling and Response Mechanisms and Roles in Plant Growth and Development. In: *Genetics, Genomics and Breeding of Poplar*. Science Publishers, pp 231-254. doi:10.1201/b10819-10

Khalid A, Arshad M, Zahir ZA (2004) Screening plant growth-promoting rhizobacteria for improving growth and yield of wheat. *J Appl Microbiol* 96 (3):473-480.

Laskowski M, Grieneisen VA, Hofhuis H, Hove CA, Hogeweg P, Maree AF, Scheres B (2008) Root system architecture from coupling cell shape to auxin transport. *PLoS Biol* 6 (12):e307.

Lavy M, Estelle M. Mechanisms of auxin signaling. (2016) *Development*. 143(18):3226-9.

Lewis DR, Negi S, Sukumar P, Muday GK (2011) Ethylene inhibits lateral root development, increases IAA transport and expression of PIN3 and PIN7 auxin efflux carriers. *Development* 138 (16):3485-3495.

Malamy JE (2005) Intrinsic and environmental response pathways that regulate root system architecture. *Plant Cell and Environment* 28 (1):67-77.

Marhavy P, Vanstraelen M, De Rybel B, Zhaojun D, Bennett MJ, Beeckman T, Benkova E (2013) Auxin reflux between the endodermis and pericycle promotes lateral root initiation. *EMBO J* 32 (1):149-158.

Oelmüller R, Sherameti I, Tripathi S, Varma A (2009) *Piriformospora indica*, a cultivable root endophyte with multiple biotechnological applications. *Symbiosis* 49 (1):1-17.

Okushima Y, Fukaki H, Onoda M, Theologis A, Tasaka M (2007) ARF7 and ARF19 regulate lateral root formation via direct activation of LBD/ASL genes in Arabidopsis. *Plant Cell* 19 (1):118-130.

Okushima Y, Overvoorde PJ, Arima K, Alonso JM, Chan A, Chang C, Ecker JR, Hughes B, Lui A, Nguyen D, Onodera C, Quach H, Smith A, Yu G, Theologis A (2005) Functional genomic analysis of the AUXIN RESPONSE FACTOR gene family members in Arabidopsis thaliana: unique and overlapping functions of ARF7 and ARF19. *Plant Cell* 17 (2):444-463.

Peret B, De Rybel B, Casimiro I, Benkova E, Swarup R, Laplace L, Beeckman T, Bennett MJ (2009a) Arabidopsis lateral root development: an emerging story. *Trends in Plant Science* 14 (7):399-408.

Peskan-Berghofer T, Shahollari B, Giong PH, Hehl S, Markert C, Blanke V, Kost G, Varma A, Oelmüller R (2004) Association of Piriformospora indica with Arabidopsis thaliana roots represents a novel system to study beneficial plant-microbe interactions and involves early plant protein modifications in the endoplasmic reticulum and at the plasma membrane. *Physiologia Plantarum* 122 (4):465-477.

Petrásek J, Černá A, Schwarzerová K, Elckner M, Morris DA, Zazimalová E (2003) Do phytohormones inhibit auxin efflux by impairing vesicle traffic? *Plant Physiol* 131 (1):254-263.

Poupin MJ, Greve M, Carmona V, Pinedo I (2016) A Complex Molecular Interplay of Auxin and Ethylene Signaling Pathways Is Involved in Arabidopsis Growth Promotion by Burkholderia phytofirmans PsJN. *Front Plant Sci* 7:492.

Remans R, Croonenborghs A, Gutierrez RT, Michiels J, Vanderleyden J (2007) Effects of plant growth-promoting rhizobacteria on nodulation of Phaseolus vulgaris L. are dependent on plant P nutrition. *European Journal of Plant Pathology* 119 (3):341-351.

Roosjen M, Pague S, Weijers D. (2018) Auxin Response Factors: output control in auxin biology. *J Exp Bot.* 69(2):179-188.

Sawana, A., Adeolu, M., and Gupta, R. S. (2014). Molecular signatures and phylogenomic analysis of the genus Burkholderia: proposal for division of this genus into the emended genus Burkholderia containing pathogenic organisms and a new genus Paraburkholderia gen. nov. harboring environmental species. *Front. Genet.* 5:429.



Sessitsch, A., Coenye, T., Sturz, A. V., Vandamme, P., Barka, E. A., Salles, J. F., et al. (2005). *Burkholderia phytofirmans* sp. nov., a novel plant-associated bacterium with plant-beneficial properties. *Int. J. Syst. Evol. Microbiol.* 55, 1187–1192.

Sirrenberg A, Gobel C, Grond S, Czempinski N, Ratzinger A, Karlovsky P, Santos P, Feussner I, Pawlowski K (2007) Piriformospora indica affects plant growth by auxin production. *Physiol Plant* 131 (4):581-589.

Spaepen S, Bossuyt S, Engelen K, Marchal K, Vanderleyden J (2014) Phenotypical and molecular responses of *Arabidopsis thaliana* roots as a result of inoculation with the auxin-producing bacterium *Azospirillum brasilense*. *New Phytol* 201 (3):850-861.

Spaepen S, Vanderleyden J (2011) Auxin and plant-microbe interactions. *Cold Spring Harb Perspect Biol* 3 (4).

Sukumar P, Legue V, Vayssieres A, Martin F, Tuskan GA, Kalluri UC (2013) Involvement of auxin pathways in modulating root architecture during beneficial plant microorganism interactions. *Plant Cell and Environment* 36 (5):909-919.

Taylor-Teeple M, Lanctot A, Nemhauser JL. (2016) As above, so below: Auxin's role in lateral organ development. *Dev Biol.* 419(1):156-164.

Teale WD, Paponov IA, Palme K (2006) Auxin in action: signalling, transport and the control of plant growth and development. *Nat Rev Mol Cell Biol* 7 (11):847-859.

Timm CM, Campbell AG, Utturkar SM, Jun SR, Parales RE, Tan WA, Robeson MS, Lu TY, Jawdy S, Brown SD, Ussery DW, Schadt CW, Tuskan GA, Doktycz MJ, Weston DJ, Pelletier DA (2015) Metabolic functions of *Pseudomonas fluorescens* strains from *Populus deltoides* depend on rhizosphere or endosphere isolation compartment. *Front Microbiol* 6:1118.

Verbon EH, Liberman LM (2016) Beneficial Microbes Affect Endogenous Mechanisms Controlling Root Development. *Trends Plant Sci* 21 (3):218-229.

Verma S, Varma A, Rexer KH, Hassel A, Kost G, Sarbhoy A, Bisen P, Butehorn B, Franken P (1998) *Piriformospora indica*, gen. et sp. nov., a new root-colonizing fungus. *Mycologia* 90 (5):896-903.

Wang R, Estelle M. (2014) Diversity and specificity: auxin perception and signaling through the TIR1/AFB pathway. *Curr Opin Plant Biol.* 21:51-58.

- Weston DJ, Pelletier DA, Morrell-Falvey JL, Tschaplinski TJ, Jawdy SS, Lu TY, Allen SM, Melton SJ, Martin MZ, Schadt CW, Karve AA, Chen JG, Yang X, Doktycz MJ, Tuskan GA (2012) *Pseudomonas fluorescens* induces strain-dependent and strain-independent host plant responses in defense networks, primary metabolism, photosynthesis, and fitness. *Mol Plant Microbe Interact* 25 (6):765-778.
- Wilmoth JC, Wang S, Tiwari SB, Joshi AD, Hagen G, Guilfoyle TJ, Alonso JM, Ecker JR, Reed JW (2005) NPH4/ARF7 and ARF19 promote leaf expansion and auxin-induced lateral root formation. *Plant J* 43 (1):118-130.
- Zamioudis C, Mastranesti P, Dhonukshe P, Blilou I, Pieterse CM (2013) Unraveling root developmental programs initiated by beneficial *Pseudomonas* spp. bacteria. *Plant Physiol* 162 (1):304-318.
- Zhao Y (2010) Auxin biosynthesis and its role in plant development. *Annu Rev Plant Biol* 61:49-64.

**Supplemental Fig 1. a)** Effect on root architecture of wild-type *Arabidopsis* seedlings post- 7-day co-culture with **b)** *Pseudomonas fluorescens* GM30 bacterial or *Serendipita indica* fungal cultures.

**a)**

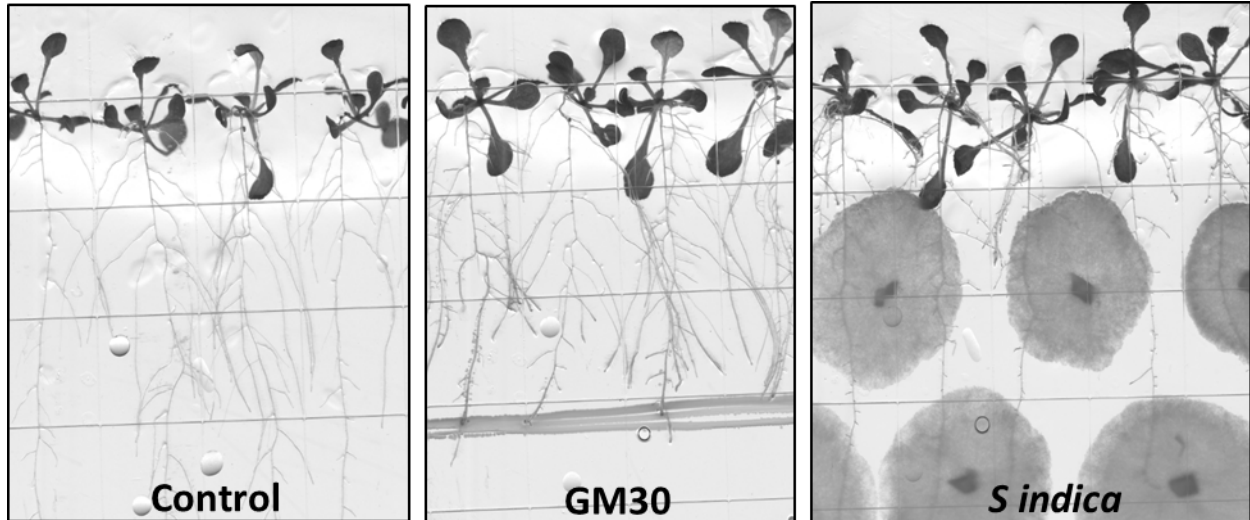

**b)**

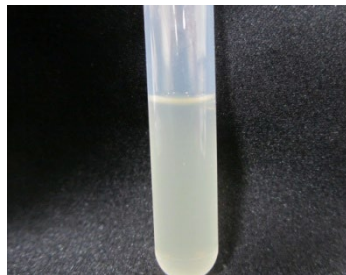

*Pseudomonas fluorescens* GM30

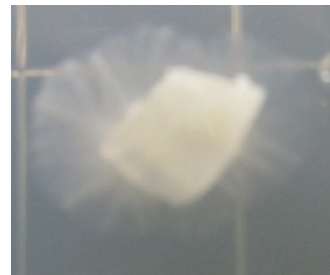

*Serendipita indica*
